# Supplementary material for: Autonomous robotic searching and assembly of two-dimensional crystals to build van der Waals superlattices
Source: PubMed Central journal article supplement (PMC5897399; doi:10.1038/s41467-018-03723-w), 2018-04-12
Supplement: 41467_2018_3723_MOESM1_ESM.pdf [file 41467_2018_3723_MOESM1_ESM.pdf]

1 **Supplementary Information**

2 **Autonomous robotic searching and assembly of two-dimensional crystals to build van der**

3 **Waals superlattices**

4 Satoru Masubuchi<sup>1,\*</sup>, Masataka Morimoto<sup>1</sup>, Sei Morikawa<sup>1</sup>, Momoko Onodera<sup>1</sup>, Yuta Asakawa<sup>1</sup>,  
5 Kenji Watanabe<sup>2</sup>, Takashi Taniguchi<sup>2</sup>, and Tomoki Machida<sup>1,\*</sup>

6 *<sup>1</sup>Institute of Industrial Science, University of Tokyo, 4-6-1 Komaba, Meguro, Tokyo 153-8505*

7 *Japan*

8 *<sup>2</sup>National Institute for Materials Science, 1-1 Namiki, Tsukuba, Ibaraki 305-0044 Japan*

9 *\*Correspondence: [mastoru@iis.u-tokyo.ac.jp](mailto:mastoru@iis.u-tokyo.ac.jp); [tmachida@iis.u-tokyo.ac.jp](mailto:tmachida@iis.u-tokyo.ac.jp)*

10

11 Supplementary Figures

12

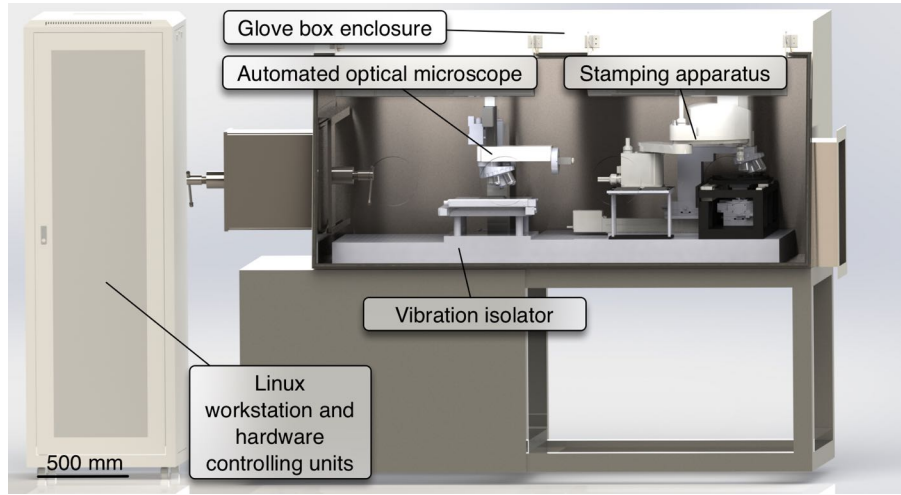

13

14

Supplementary Figure 1. The CAD schematics of our robotic assembly system.

15

16

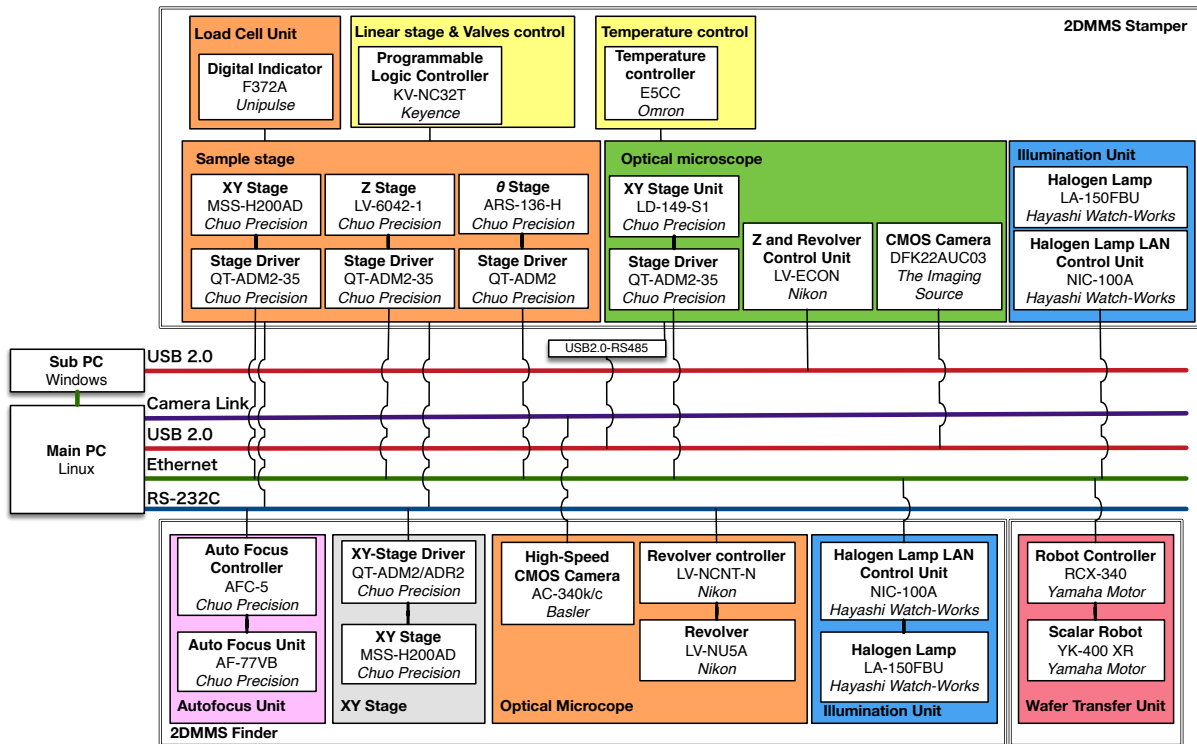

17

18 Supplementary Figure 2. The connectivity diagram of the hardware components utilized in

19 the system.

20

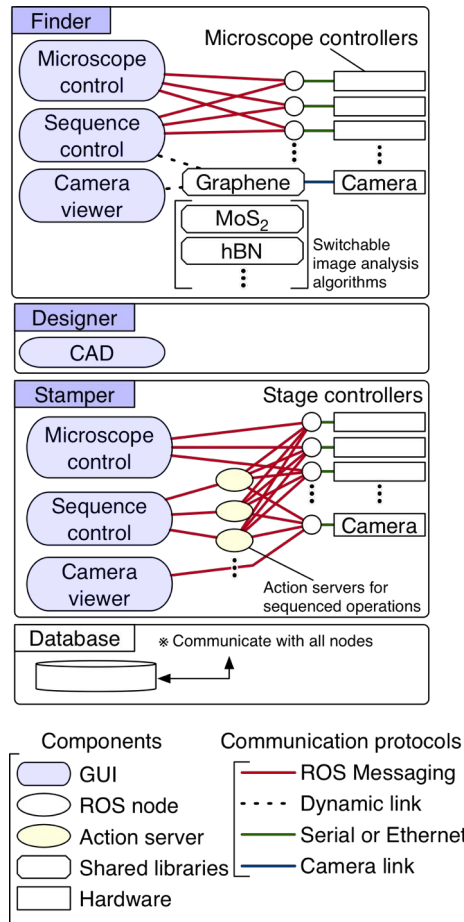

21

22 Supplementary Figure 3. **Software connectivity diagram of our automated stamping system.**

23 The GUI consists of three major components: a finder, designer, and stamper. Each GUI sends

24 commands to the ROS action servers and nodes. The image detection algorithms are provided as

25 shared dynamic link libraries; thus, the algorithms can be switched without shutting down the

26 software.

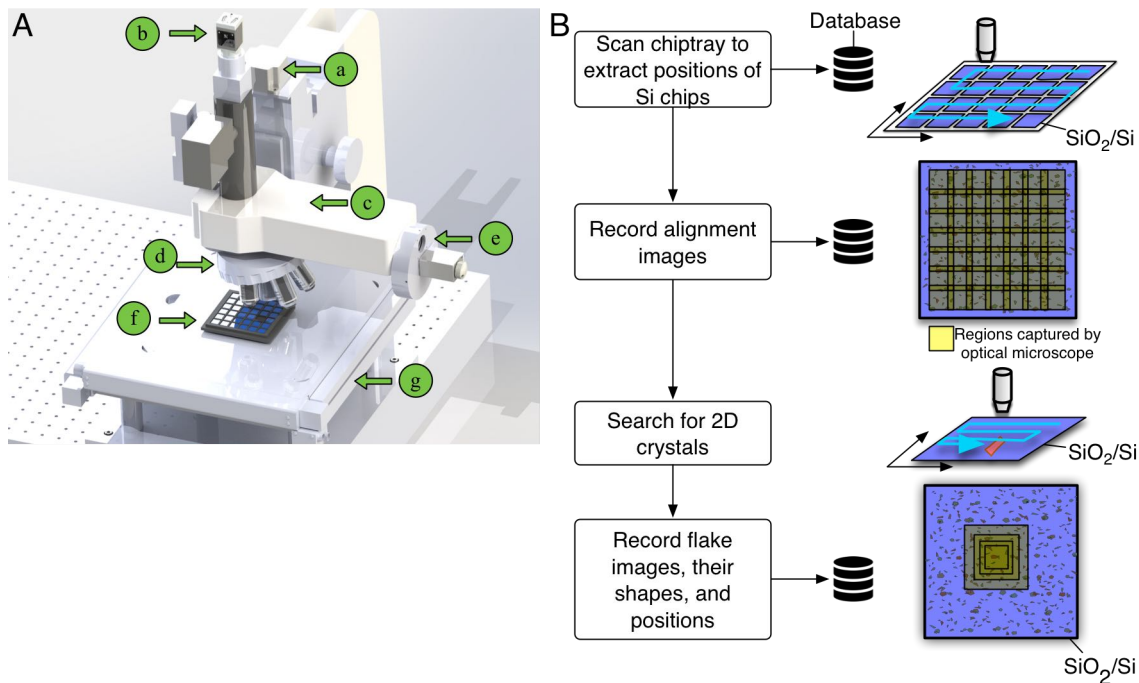

27

28 Supplementary Figure 4. **The hardware components and the functionalities of automated**

29 **searching system (2DMMS-Finder).** (A) Computer-assisted design (CAD) schematics of

30 automated searching system. The searching system consists of the following components: (a) Z-

31 axis scanning stage (Chuo Precision Industrial Co., Ltd.); (b) high-speed CMOS camera (Basler

32 AG, ac2000-340kc); (c) automated focusing unit (Chuo Precision Industrial Co., Ltd., AF-77VB);

33 (d) motorized objective lens (Nikon Corp., LV-NU5A); (e) motorized optical filter wheel

34 (Thorlabs, Inc., FW103H); (f) SiO<sub>2</sub>/Si chip tray, which accommodates 36 Si chips (Entegris, Inc.);

35 (g) high-speed motorized XY-scanning stage (Chuo Precision Industrial Co., Ltd., MSS-

36 H200AD); and (not shown) halogen lamp (Hayashi Watch Works Co., Ltd., LA-150FBU). (B)

37 Schematic operational flow diagram of 2DMMS-Finder.

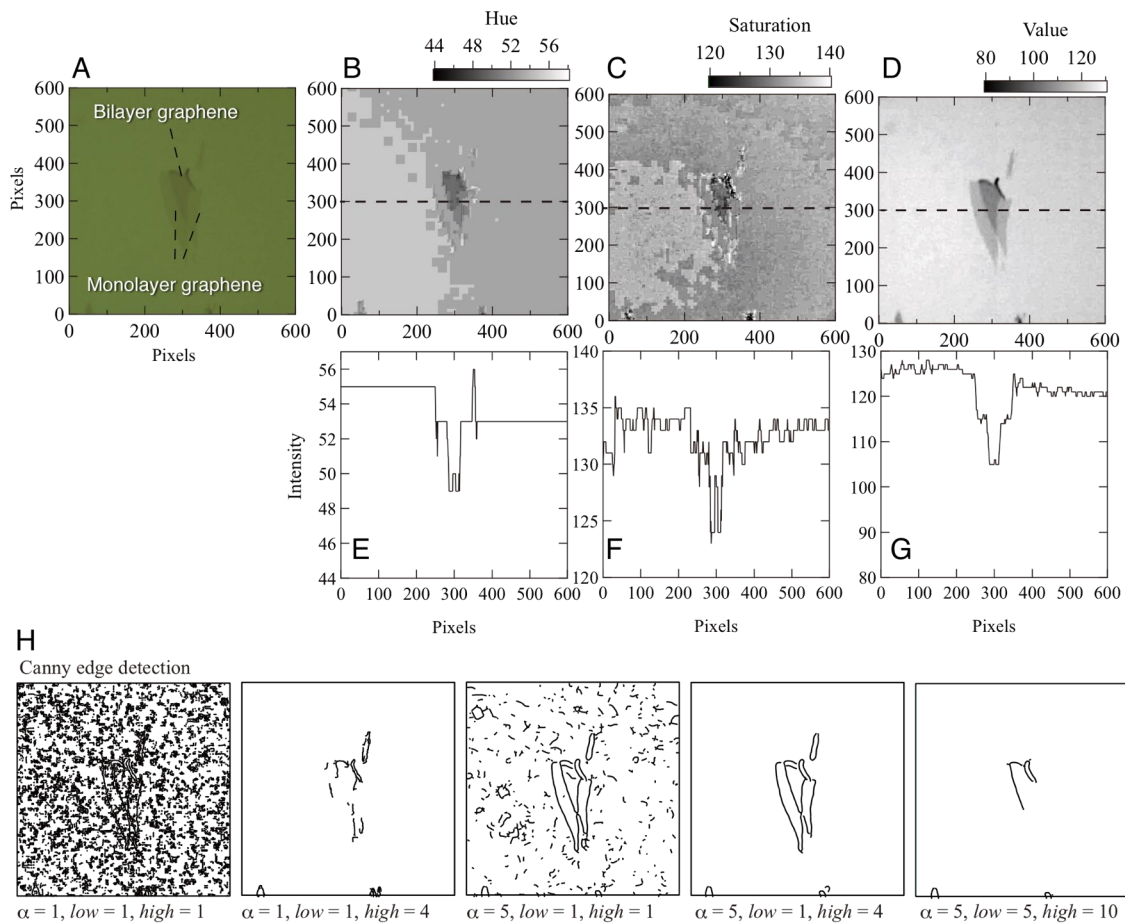

38

39 **Supplementary Figure 5. The representative optical microscope image data utilized for tuning**  
 40 **the parameters of the flake detection algorithm.** (A) optical microscope image of monolayer  
 41 and bilayer graphene on SiO<sub>2</sub>/Si. (B–D) Intensity mapping of hue, saturation, and value channels,  
 42 respectively, of the image shown in (A). (E–G) Profile along dotted lines in (B–D), respectively.  
 43 (H) Results of the Canny edge detection algorithm applied to the image in (A). The edge detection  
 44 parameters are  $(\alpha, low, high) = (1, 1, 1)$ ;  $(1, 1, 4)$ ;  $(5, 1, 1)$ ;  $(5, 1, 4)$ ; and  $(5, 5, 10)$ .

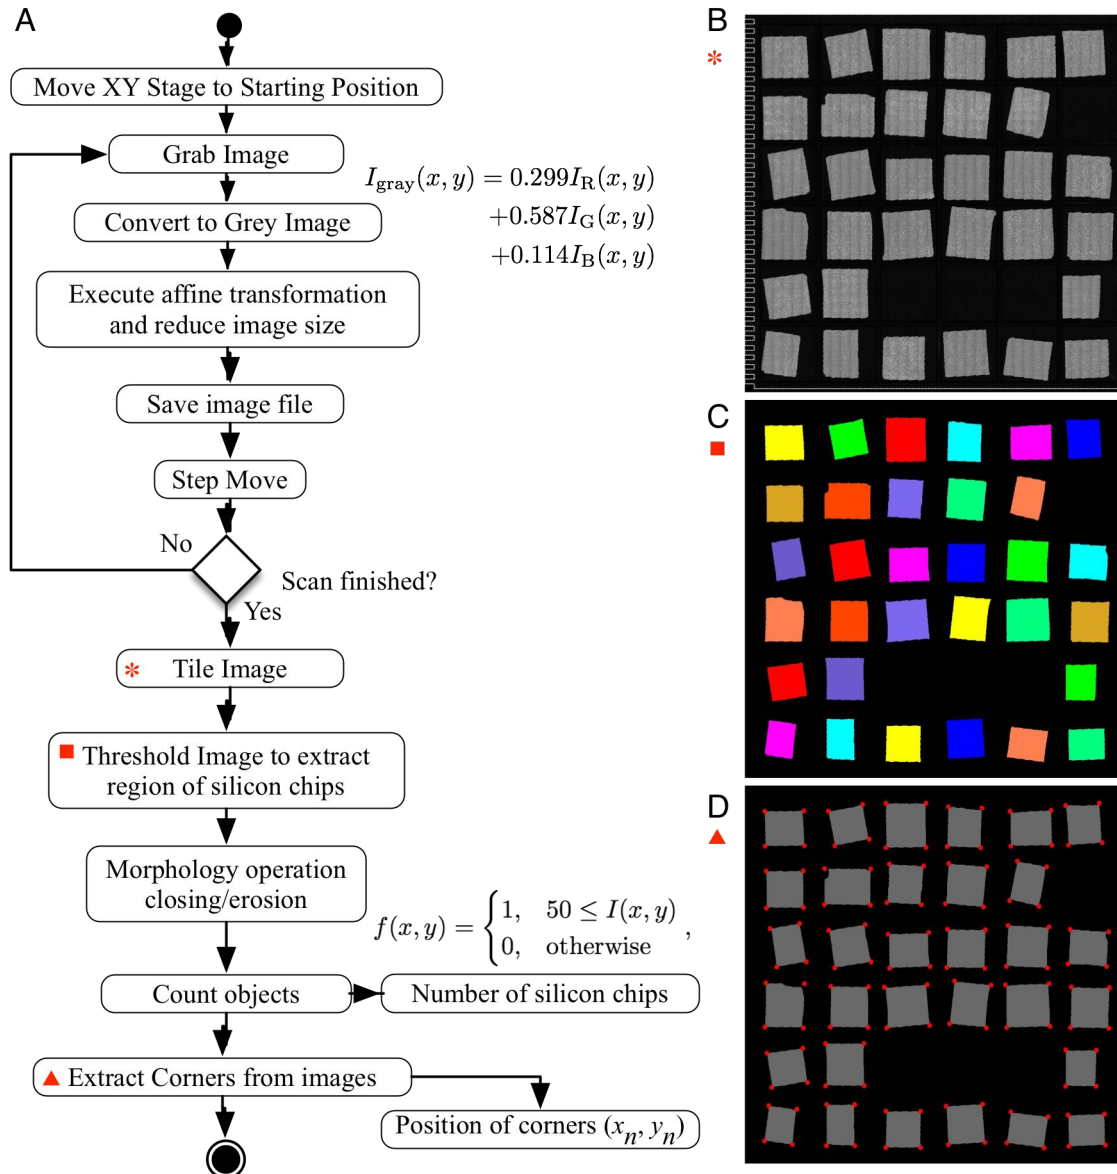

45

46 Supplementary Figure 6. **Image processing algorithm used to extract the number and positions**

47 **of SiO<sub>2</sub>/Si chips.** (A) Flow diagram of the algorithm. (B) Tiled grayscale image. (C) Regions

48 extracted as silicon chips. (D) Extracted rectangles that fit the silicon chip regions.

49

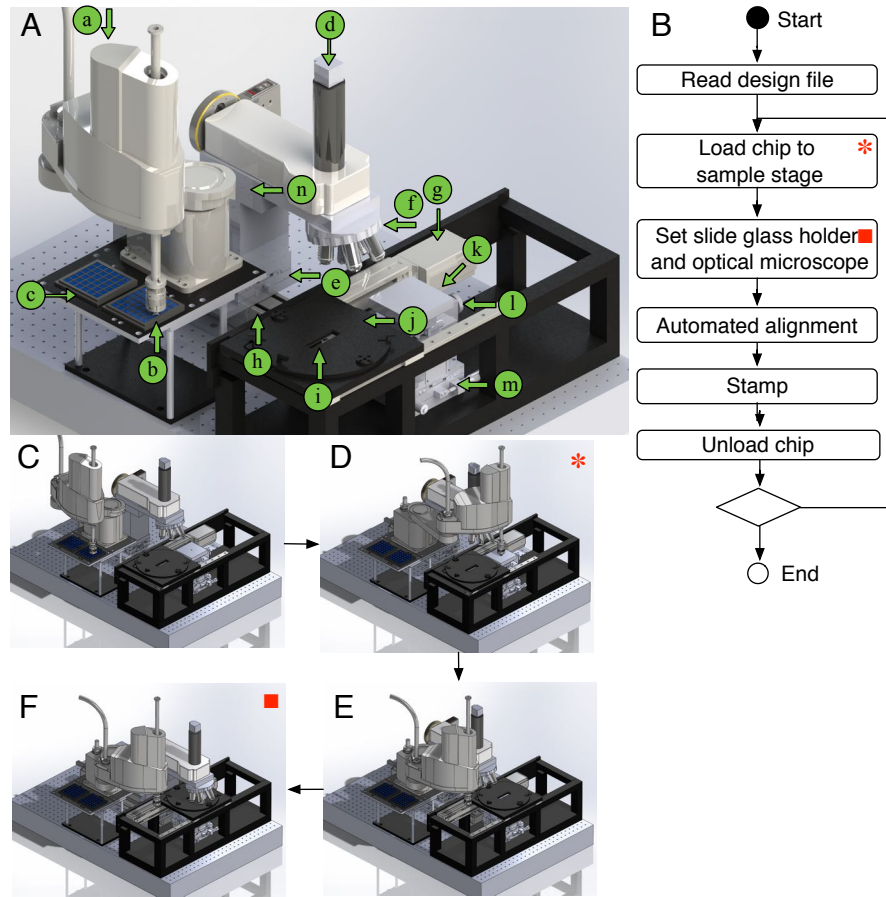

50

51 **Supplementary Figure 7. The hardware components and the functionalities of automated**  
 52 **assembly system (2DMMS-Stamper).** (A) CAD schematics of our automated stamping system.

53 The hardware components are: (a) a Selective Compliance Assembly Robot Arm (Yamaha Motor  
 54 Co., Ltd., YK400XR); (b) non-contact wafer tweezers (Solar Research Laboratory Co., Ltd.); (c)  
 55 SiO<sub>2</sub>/Si chip tray (Entegris, Inc.); (d) USB-2.0 CMOS camera (The Imaging Source Asia Co., Ltd.,  
 56 DFK22AUC03); (e) XY-stage unit for optical microscope (Chuo Precision Industrial Co., Ltd.,  
 57 LD-149-S1); (f) motorized objective lens turret (Nikon Corp., LV-NU5A); (g) linear sliding stage  
 58 for optical microscope slide (IAI Corp., ERC2-SA6C-I-PM-6-NP-200-M-NM); (h) linear sliding  
 59 stage for optical microscope (IAI Corp., ERC2-SA7C-I-PM-4-200-NP-M); (i) slide glass with  
 60 stamp (homemade); (j) load cell units (TEAC Co., Ltd., TU-PGRS); and (k) sample stage with  
 61 heater and temperature sensor; (l)  $\theta$ -stage unit for the sample stage (Chuo Precision Industrial

62 Co., Ltd., ARS-136-H); (m) XYZ -stage unit for sample stage (Chuo Precision Industrial Co., Ltd.,  
 63 MSS-H200AD and LV-6042-1); (n) Z-stage unit for optical microscope (Nikon Corp., LV-FMA);  
 64 (o) (not drawn) stabilized halogen lamp unit (Hayashi Watch Works, LA-150FBU); (p) (not  
 65 drawn) temperature controller (Omron Corp., E5CC); (q) (not drawn) load sensing unit (Unipulse  
 66 Corp., F372A); (r) (not drawn) programmable logic controller (Keyence Co., Ltd., KV-NC32) to  
 67 control linear stages, and the solenoid valves for vacuum chucking. Assembly of hardware  
 68 components d–h and j–r was performed by Nanotech, Inc. Connections to other components and  
 69 the installation into the glovebox were performed by the author. The controlling programs were  
 70 developed by the author. (B) Schematic operational steps. (C–F) Step-by step schematic  
 71 operational steps of the apparatus.

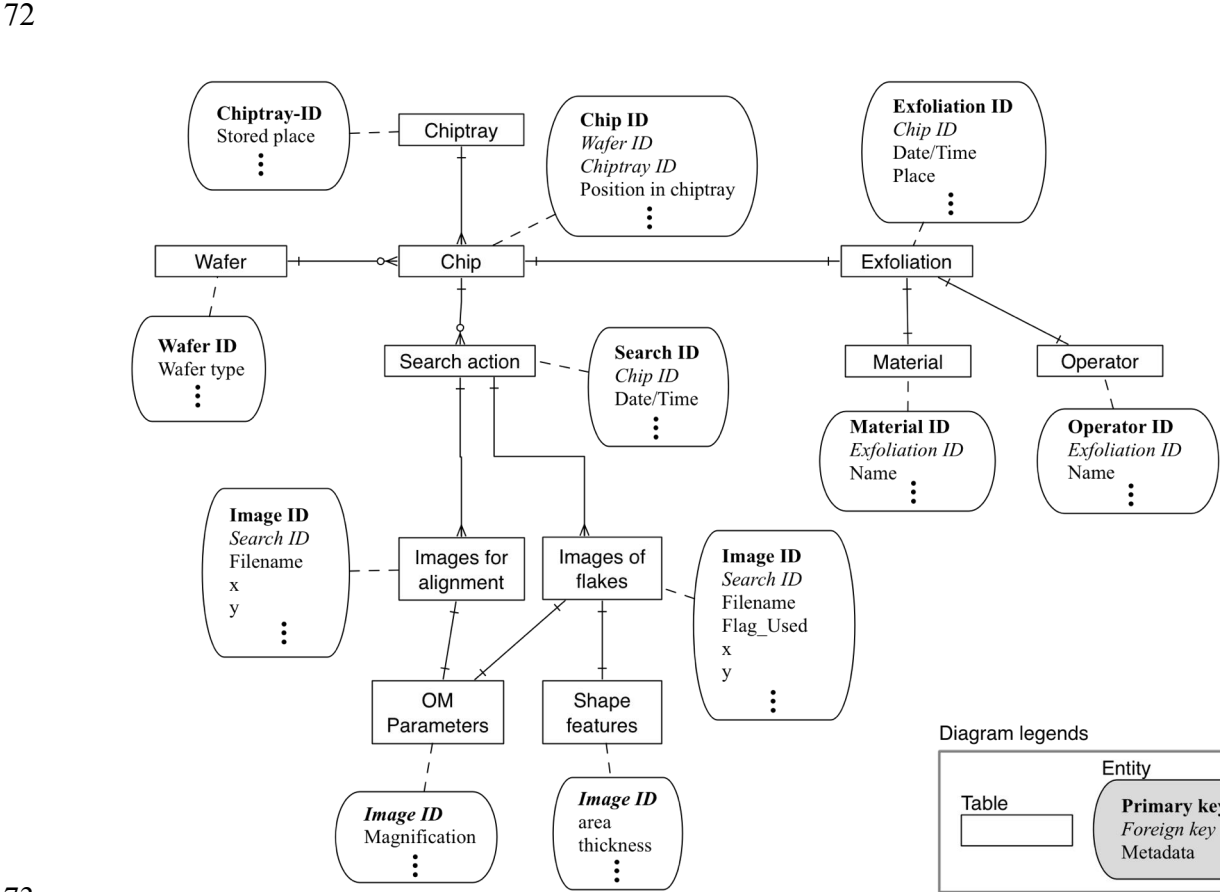

73  
 74 Supplementary Figure 8. **Entity-relation diagram of the database.** The rectangles represent



75 entities in the database, the connecting lines represent relationships between these entities (1-to-1,  
76 1-to-N, and 1-to-M), and the labels in close proximity to the squares identify the database tables  
77 corresponding to the associated entities.

78

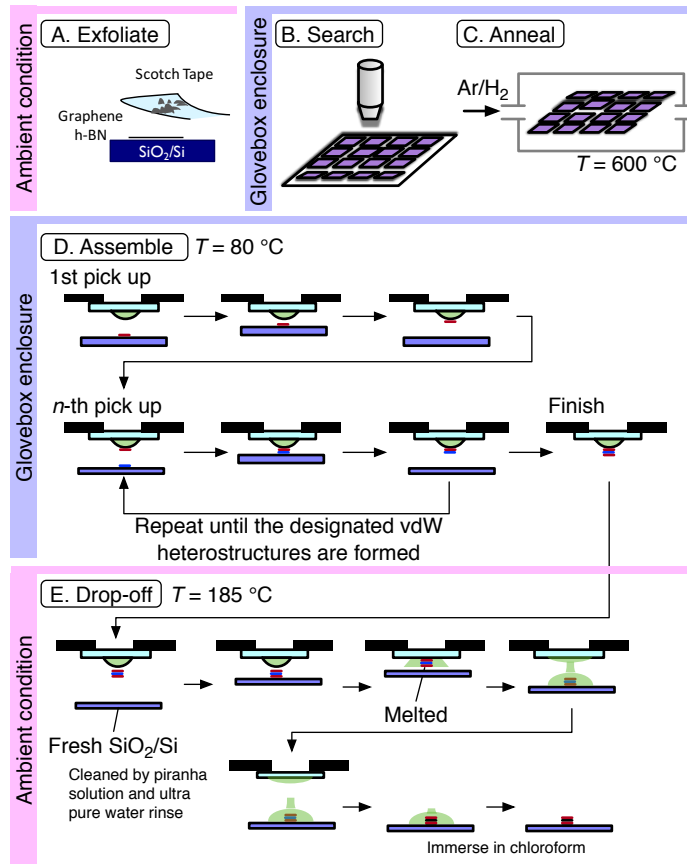

79

80 Supplementary Figure 9. **The schematic flow diagram of the fabrication process, including the**  
81 **pre- and post-treatments of the SiO<sub>2</sub>/Si substrates.** The process consists of (A) Exfoliation, (B)  
82 Searching, (C) Annealing, (D) Assembly, and (E) Drop off. Among them, (A) and (E) were  
83 conducted in the ambient air. The processes (B)-(D) were conducted in the glovebox enclosure.

84

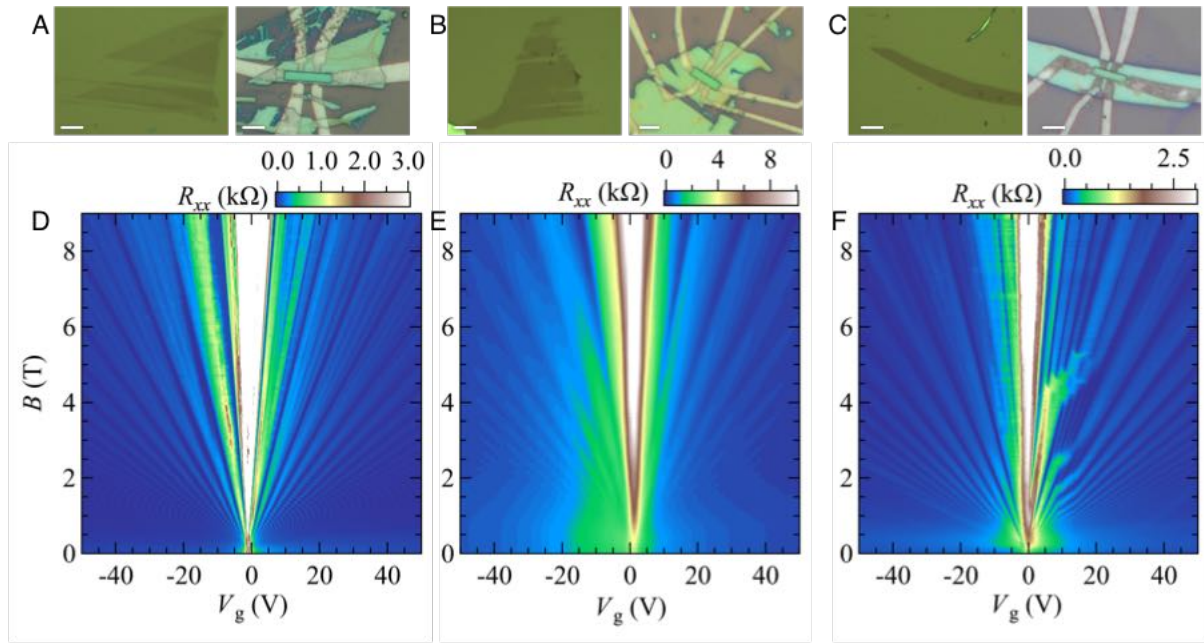

85

86 Supplementary Figure 10. **The transport properties utilized for verifying the correspondence**

87 **between layer thickness and optical color contrast.** (A)-(C) Optical microscope images of (A)

88 monolayer, (B) bilayer, and (C) trilayer graphene devices. The scale bars correspond to 4  $\mu\text{m}$ . (D)-

89 (F) Color plots of the longitudinal resistance  $R_{xx}$  measured as a function of back-gate bias voltage

90  $V_g$  and perpendicular magnetic fields  $B$  at  $T = 1.7$  K for (A) monolayer, (B) bilayer, and (C)

91 trilayer graphene devices.

92

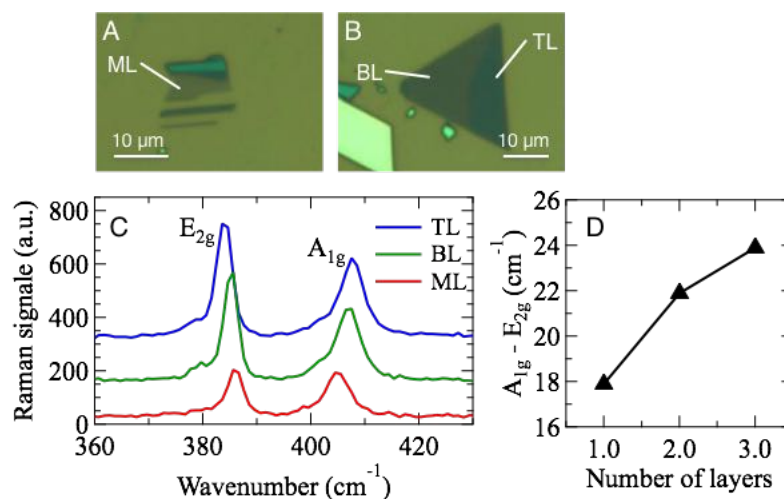

93

94 Supplementary Figure 11. **The Raman spectrum utilized for verifying the correspondence**  
 95 **between optical color contrast and layer thickness of MoS<sub>2</sub> flakes.** A and B Optical microscope  
 96 images of monolayer, bilayer, and trilayer MoS<sub>2</sub>. Raman spectrum of MoS<sub>2</sub> flakes measured for  
 97 (A) monolayer, (B) bilayer, and (C) trilayer by using 533-nm laser.

98

## 99 Supplementary tables

| <b>Task</b>                                                                                                                                                                   | <b>time</b>     |
|-------------------------------------------------------------------------------------------------------------------------------------------------------------------------------|-----------------|
| <b>Search graphene and record their positions</b>                                                                                                                             | 8 hours         |
| <b>Search hBN and record their positions</b>                                                                                                                                  | 8 hours         |
| <b>Design heterostructure</b>                                                                                                                                                 | 1 hour          |
| <b>Anneal the sample in Ar/H<sub>2</sub> atmosphere</b>                                                                                                                       | 4 hours         |
| <b>Transferring SiO<sub>2</sub>/Si chips between experimental apparatus<br/>(e.g. transfer silicon chips between chiptray and annealing chamber)</b>                          | 1 hour          |
| <b>Assembly</b>                                                                                                                                                               | 8 hours         |
| <b>Miscellaneous tasks such as setting the slide glass, starting up stamping program,<br/>operating valves and gas handling systems for annealing apparatus... and so on.</b> | 2 hours         |
| <b>Total</b>                                                                                                                                                                  | <b>32 hours</b> |

100 Supplementary Table 1. **The breakdown for the operation time.**

101

| Task                                                                                         |                 |
|----------------------------------------------------------------------------------------------|-----------------|
| Loading silicon chips to the glovebox enclosure                                              | 10 minutes      |
| Tuning the parameters for detecting graphene and start program                               | 20 minutes      |
| Tuning the parameters for detecting hBN and start program                                    | 20 minutes      |
| Loading silicon chips for annealing chamber                                                  | 20 minutes      |
| Unloading silicon chips from annealing chamber                                               | 20 minutes      |
| Designing vdW heterostructures                                                               | 60 minutes      |
| Tuning the parameters for assembly and start program                                         | 30 minutes      |
| Confirm the alignment and perform manual alignment when it's needed                          | 2x30=60 minutes |
| Dropping vdW stack onto the SiO <sub>2</sub> /Si substrate                                   | 30 min.         |
| Miscellaneous tasks; e.g. setting the slide glass, starting up computer, operating valves... | 1.5 hours       |
| <b>Total</b>                                                                                 | <b>6 hours</b>  |

102 Supplementary Table 2. **The task breakdown for the human involvement.**

103

104

| Condition | Target | $C_H$ | $D_H$ | $C_S$ | $D_S$ | $C_V$ | $D_V$ | Low | High | $\alpha$ | $U_{Entropy}$ | $L_{Area}$ |
|-----------|--------|-------|-------|-------|-------|-------|-------|-----|------|----------|---------------|------------|
| 1         | MLG    | 0     | 10    | -8    | 8     | -10   | 4     | 2   | 4    | 1        | 4.8           | 300        |
| 2         | BLG    | 0     | 10    | -14   | 8     | -19   | 4     | 2   | 4    | 1        | 4.8           | 300        |
| 3         | TLG    | 0     | 10    | -20   | 8     | -28   | 4     | 2   | 4    | 1        | 4.8           | 300        |
| 4         | MLG    | 0     | 10    | -8    | 8     | -10   | 4     | --  | --   | --       | --            | 300        |
| 5         | BLG    | 0     | 10    | -14   | 8     | -19   | 4     | --  | --   | --       | --            | 300        |
| 6         | TLG    | 0     | 10    | -20   | 8     | -28   | 4     | --  | --   | --       | --            | 300        |

105 Supplementary Table 3. **Detection parameters utilized to evaluate the performance metrics.**

106

| Condition | $n_{\text{total}}$ | $n^{\text{det}}$ | $n_{\text{false}}^{\text{det}}$ | $n^{\text{det,man}}$ | $F$ | $\tau$ |
|-----------|--------------------|------------------|---------------------------------|----------------------|-----|--------|
| 1         | 56804              | 1203             | 64                              | 1131                 | 95% | 4 h    |
| 2         | 56804              | 847              | 9                               | ---                  | 99% | 4 h    |
| 3         | 56804              | 468              | 9                               | ---                  | 98% | 4 h    |
| 4         | 56804              | 3273             | 1733                            | 1131                 | 47% | 4 h    |
| 5         | 56804              | 1612             | 357                             | ---                  | 78% | 4 h    |
| 6         | 56804              | 917              | 45                              | ---                  | 95% | 4 h    |

107 Supplementary Table 4. **Performance metrics of 2D crystal detection.** Time elapsed for  
108 searching ( $\tau$ ), number of total optical microscope images inspected ( $n_{\text{total}}$ ), number of detections  
109 ( $n^{\text{det}}$ ), number of false detections ( $n_{\text{false}}^{\text{det}}$ ), number of flakes detected by inspection of  
110 optical microscope images ( $n^{\text{det,man}}$ ), and percentage of correct answers ( $F$ ).

111

| <b>Material</b>                  | <b># of chips inspected</b> | <b>Elapsed time (h)</b> | <b>Detected</b> | <b># of false positive (by layer thickness)</b> | <b># of false positive (by particle)</b> | <b>Percentage of correct answer</b> |
|----------------------------------|-----------------------------|-------------------------|-----------------|-------------------------------------------------|------------------------------------------|-------------------------------------|
| <b>Monolayer Graphene</b>        | 27                          | 4                       | 1886            | 8                                               | 115                                      | 93.5                                |
| <b>Bilayer Graphene</b>          | 27                          | 4                       | 1668            | 8                                               | 25                                       | 98.0                                |
| <b>Trilayer Graphene</b>         | 27                          | 4                       | 1129            | 31                                              | 7                                        | 96.6                                |
| <b>Monolayer MoS<sub>2</sub></b> | 31                          | 6                       | 362             | 4                                               | 23                                       | 92.5                                |
| <b>Bilayer MoS<sub>2</sub></b>   | 31                          | 6                       | 166             | 4                                               | 1                                        | 97.0                                |
| <b>Trilayer MoS<sub>2</sub></b>  | 31                          | 6                       | 288             | 3                                               | 1                                        | 98.6                                |

112 Supplementary Table 5. Spreadsheet summary of the figures utilized for extracting the false  
113 detection rate.

114

115 Supplementary notes

116 Supplementary note 1

117 Transport characteristics of the fabricated devices

118 The transport measurements were conducted with a variable-temperature-insert capable of  
119 tuning the temperature from  $T = 1.5 - 400$  K. Longitudinal resistance ( $R_{xx}$ ) was measured using  
120 the standard lock-in technique with an alternating current of  $I_{ac} = 10$  nA. An Si substrate was  
121 utilized as a global back-gate to tune the charge carrier density,  $n_e = C_g(V_g - V_{Dirac})$ , where  $C_g$  is  
122 the gate capacitance,  $C_g = 9 \times 10^{-8}$  Farad/cm<sup>2</sup>;  $V_g$  is the gate bias voltage; and  $V_{Dirac}$  is the  
123 value of  $V_g$  at the charge neutrality point.

124 We present the transport characteristics of the following three devices fabricated by  
125 2DMMS: [Supplementary Figure 12A] monolayer graphene encapsulated in hBN, [Supplementary  
126 Figure 12B] monolayer graphene with crystallographic alignment to hBN crystals, and  
127 [Supplementary Figure 12C] graphene/bilayer hBN/bilayer graphene with vertical tunneling. In  
128 Supplementary Figure 12A, the  $R_{xx}$  vs.  $V_g$  curve shows a narrow peak with a full width at half  
129 maximum of  $\delta V_g \approx 0.2$  V, indicating a small inhomogeneity in the charge carrier density. The  
130 charge carrier mobility reached  $\mu \approx 1,000,000$  cm<sup>2</sup>/Vs, which is comparable to those reported in  
131 the highest quality devices<sup>18</sup>. Supplementary Figure 12B shows  $R_{xx}$  versus  $V_g$  for the aligned  
132 monolayer graphene/hBN heterostructures. The presence of peak structures at  $V_g = \pm 40$  V  
133 indicates second-generation charge neutrality points due to a Moiré superlattice, demonstrating  
134 that the crystallographic orientation between graphene and hBN flakes can be successfully tuned  
135 by our system. Supplementary Figure 12C shows the differential conductance  $dI/dV_{sd}$  measured  
136 between graphene and bilayer graphene through bilayer hBN as a function of  $V_g$  and the source-



137 drain bias voltage  $V_{sd}$ . A region of suppressed conductance is observed at approximately  $V_{sd} =$   
 138 0 mV, indicating the realization of tunneling transport through thin hBN.

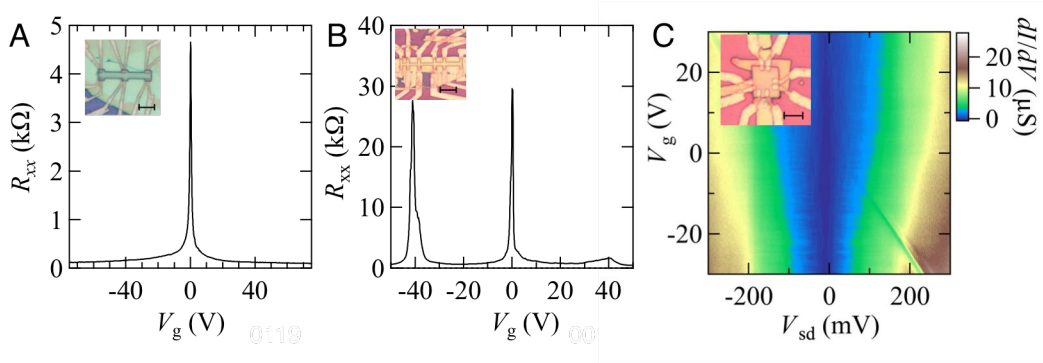

139  
 140 **Supplementary Figure 12. Evaluation of transport characteristics of the fabricated devices.**  
 141 (A) Longitudinal resistance ( $R_{xx}$ ) of monolayer graphene encapsulated in hBN as a function of  
 142 back-gate bias voltage ( $V_g$ ) measured at  $T = 4.2$  K. (B)  $R_{xx}$  as a function of  $V_g$  for aligned  
 143 graphene/hBN heterostructures measured at  $T = 4.2$  K. (C) Color plot of differential conductance  
 144  $dI/dV$  of the graphene/bilayer hBN/bilayer graphene tunneling device as a function of  $V_g$  and bias  
 145 voltage applied between the monolayer and bilayer graphene  $V_{sd}$ . The blue region indicates  
 146 suppressed conductance. (A–C) Insets indicate the optical microscope images of the measured  
 147 devices. The scale bars indicate  $2 \mu\text{m}$ .

148

## 149 Supplementary note 2

### 150 Evaluation of the charge carrier mobility in BN/G/BN heterostructures

151 We performed transport measurements in two hBN/graphene/hBN heterostructures at  $T =$   
 152  $4.2$  K, which we call the device I and II, respectively. The optical microscope images of devices  
 153 I and II were shown in Supplementary Figure 13 A and E, respectively. In both devices, the  
 154 longitudinal resistance ( $R_{xx}$ ) as a function of back-gate bias voltage ( $V_g$ ) exhibited sharp peak  
 155 structure with small full width at half maximum of  $\delta V_g = 0.25$  V and 0.5 V, indicating the small

156 charge carrier inhomogeneity [Supplementary Figure 13 B and F]. The  $R_{xx}$  was converted to the  
 157 longitudinal resistivity using  $\rho_{xx} = \frac{W}{L} R_{xx}$ , where  $W$  and  $L$  are the channel width and length. The  
 158 longitudinal conductivity  $\sigma_{xx} = 1/\rho_{xx}$  as a function of  $V_g$  were shown in Supplementary Figure  
 159 13 C and G. From  $\sigma_{xx}$ , we calculated the charge carrier mobility using the Drude model  $\mu = \sigma/ne$ ,  
 160 where  $n$  is the charge carrier density. The value of  $n$  was calculated by using  $n = C_g(V_g - V_{\text{Dirac}})$ ,  
 161 where  $C_g = 1 \times 10^{-4}$  F/m<sup>2</sup> is the gate capacitance, and  $V_{\text{Dirac}}$  is the position of charge neutrality  
 162 point. In the entire range of  $V_g$ , the values of charge carrier mobility exceeded  $\mu > 10^6$  cm<sup>2</sup>/Vs,  
 163 indicating the high quality of our devices.  
 164

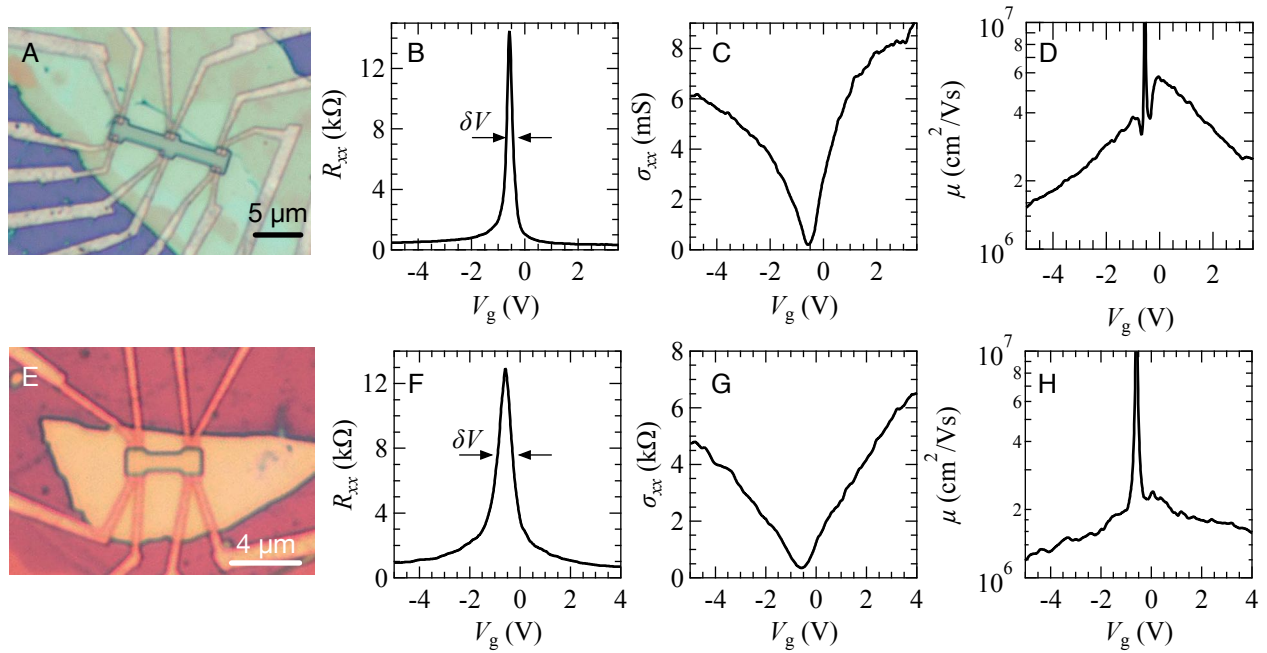

165  
 166 **Supplementary Figure 13. Evaluation of the charge carrier mobility of BN/G/BN**  
 167 **heterostructures.** (A and E) Optical microscope images of monolayer graphene encapsulated in  
 168 hBN. (B and F) Longitudinal resistance ( $R_{xx}$ ) as a function of back-gate bias voltage ( $V_g$ )  
 169 measured at  $T = 4.2$  K. (C and G) Longitudinal conductivity ( $\sigma_{xx}$ ) as a function of  $V_g$ . (D and H)

170 Charge carrier mobility  $\mu$  as a function of  $V_g$ . The data in A-D (E-H) were obtained in the device I  
171 (II).

172

### 173 Supplementary note 3

#### 174 Evaluation of the interface cleanness of the fabricated vdW heterostructure

175 In order to evaluate the interface cleanness of the fabricated vdW heterostructures, we  
176 assembled the hBN, WS<sub>2</sub>, MoS<sub>2</sub>, and hBN flakes [Supplementary Figure 14A] to  
177 hBN/WS<sub>2</sub>/MoS<sub>2</sub>/hBN heterostructure [Supplementary Figure 14 B], and conducted the  
178 photoluminescence measurements. Supplementary Figure 14 C shows the AFM image in the  
179 region surrounded by the black dashed square in Supplementary Figure 14 B. The  
180 photoluminescence spectra were taken by using a 533-nm laser to excite the monolayers of MoS<sub>2</sub>,  
181 WS<sub>2</sub> and MoS<sub>2</sub>/WS<sub>2</sub> heterostructure. The laser beam was focused to a spot size of  $\sim 1 \mu\text{m}$  with a  
182 total power of 1 mW. A monochromator and a Peltier-cooled charge-coupled device (CCD) were  
183 used to record the photoluminescence spectra. The photoluminescence spectra measured at  
184 monolayers of MoS<sub>2</sub> (green) and WS<sub>2</sub> (blue curve) were shown in Supplementary Figure 14 D.  
185 They exhibited narrow peak structure with half width at half maximum of  $\Delta\lambda = 14 \text{ nm}$  for  
186 monolayer MoS<sub>2</sub> and  $\Delta\lambda = 6.6 \text{ nm}$  for monolayer WS<sub>2</sub>, which is comparable to the best quality  
187 device reported to date [F. Cadiz et al., PRX 7, 021026 (2017)]. In addition, in the spectrum taken  
188 at MoS<sub>2</sub>/WS<sub>2</sub> heterostructure (red curve), the photoluminescence from the monolayer MoS<sub>2</sub> and  
189 WS<sub>2</sub> bands  $\lambda = 664$  and  $624 \text{ nm}$ , respectively, were significantly suppressed. This observation  
190 demonstrates the coupling between the MoS<sub>2</sub> and WS<sub>2</sub> [Y. Gong *et al.*, Nature Materials 13, 1135  
191 (2014)].

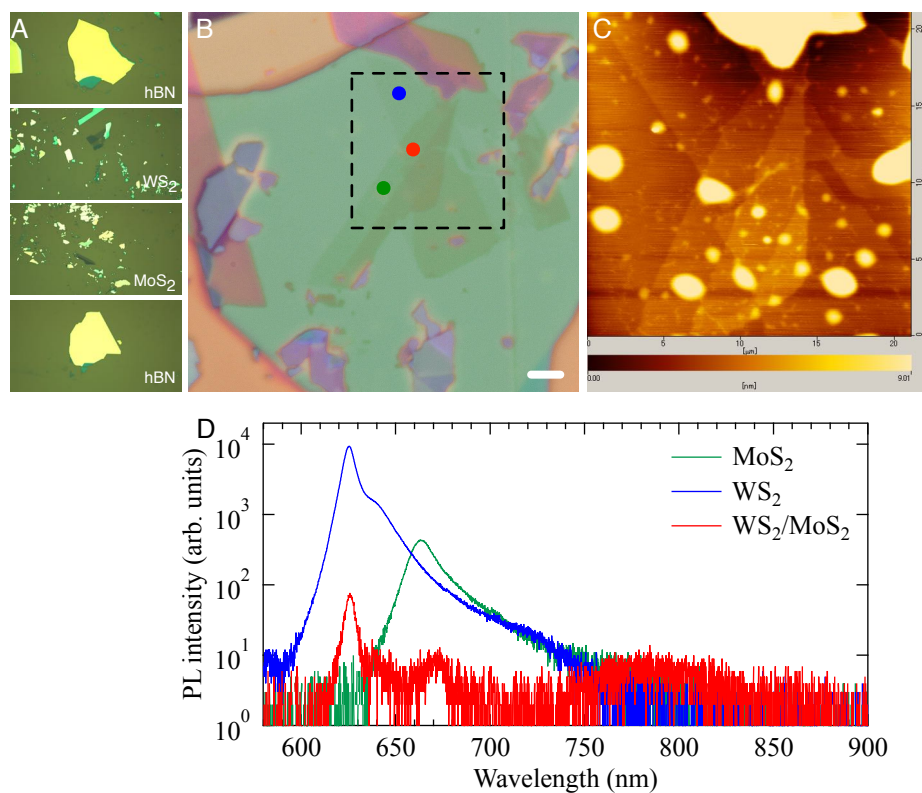

192

193 **Supplementary Figure 14. Evaluation of the optical properties of MoS<sub>2</sub>/WS<sub>2</sub> heterostructure.**

194 (A) Optical microscope images of the hBN, WS<sub>2</sub>, MoS<sub>2</sub>, and hBN flakes (top to bottom) utilized

195 for assembling WS<sub>2</sub>/MoS<sub>2</sub> heterostructures. (B) Optical microscope image of the

196 hBN/WS<sub>2</sub>/MoS<sub>2</sub>/hBN heterostructure. The scale bar corresponds to 5 μm. (C) Atomic force

197 microscope image of the region surrounded by the black dashed square in B. (D)

198 Photoluminescence spectrum measured in the regions of WS<sub>2</sub> (blue), MoS<sub>2</sub> (green), and

199 WS<sub>2</sub>/MoS<sub>2</sub> (red). The correspondence to the measurement points were indicated by the colored

200 circles in B.

201

202 **Supplementary note 4**

203 **Formation of the bubbles in the fabricated vdW heterostructures**

204 We fabricated the three vdW heterostructures; hBN/4L-graphene/hBN [Supplementary Figure 15

205 A], hBN/graphene/4-5L hBN/trilayer graphene/hBN [Supplementary Figure 15 B], and

206 hBN/MoS<sub>2</sub>/WS<sub>2</sub>/hBN [Supplementary Figure 15 C]. The AFM images of the regions surrounded  
207 by the black dashed rectangles in Supplementary Figure 15 A-C were presented in Supplementary  
208 Figure 15 D-E. In hBN/4L-graphene/hBN [Supplementary Figure 15 A], the channel region was  
209 free of bubbles [white dashed rectangle in Supplementary Figure 15 D]. In hBN/graphene/4-5L  
210 hBN/trilayer graphene/hBN [Supplementary Figure 15 B], some bubbles were discerned  
211 [Supplementary Figure 15 E], however sufficiently large area  $> 2 \times 2 \mu\text{m}$  was still remained  
212 intact, and can be provided for the tunneling transport studies. In the case of hBN/MoS<sub>2</sub>/WS<sub>2</sub>/hBN  
213 [Supplementary Figure 15 C], the situation is similar to the hBN/graphene/4-5L hBN/trilayer  
214 graphene/hBN. There were some bubbles, but the sufficiently large area was remained intact  
215 [Supplementary Figure 15 F].

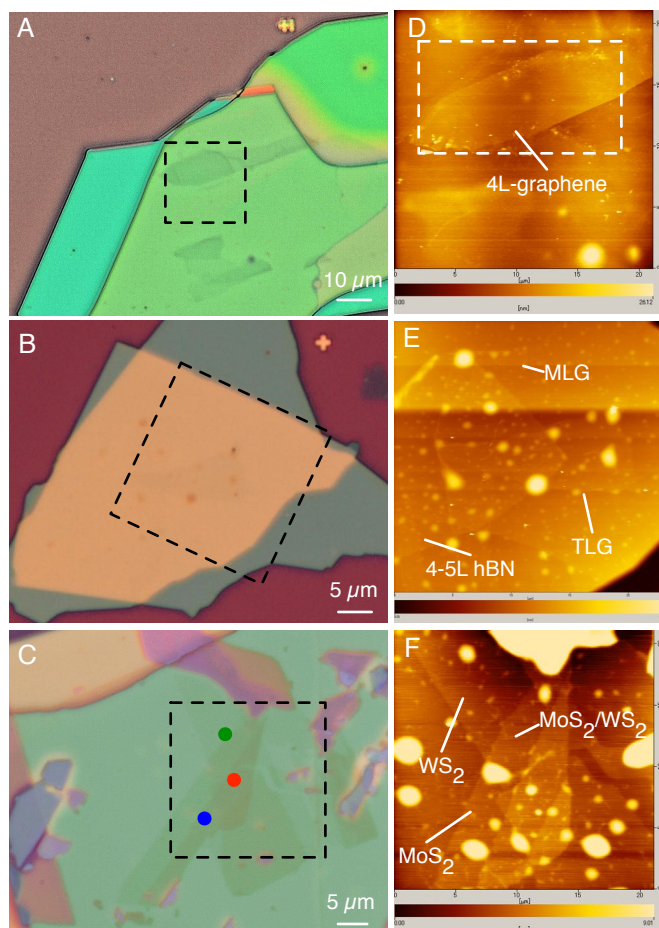

216  
 217 **Supplementary Figure 15. Evaluation of bubbles.** (A-C) Optical microscope images of (A) the  
 218 tetra layer graphene encapsulated in hBN, (B) hBN/graphene/4-5L hBN/trilayer graphene/hBN,  
 219 and (C) hBN/MoS<sub>2</sub>/WS<sub>2</sub>/hBN. (D-F) AFM images of the regions surrounded by the black dashed  
 220 rectangles in (A-C).

221  
 222 **Supplementary note 5**  
 223 **Effects of entropy thresholding on the 2DMMS-Finder performance metrics**  
 224 We conducted automated searching for monolayer, bilayer, and trilayer graphene on 18 SiO<sub>2</sub>/Si  
 225 chips using the detection parameters summarized in Supplementary Table 3. The parameters were  
 226 divided into two groups: with and without entropy thresholding; conditions 1–3 and 4–6,  
 227 respectively. The resulting performance metrics are summarized in Supplementary Table 4. In

228 Supplementary Table 4, the detection with the entropy thresholding is shown to result in a high  
229 percentage of correct answers, > 95%. In contrast, the detection without entropy thresholding  
230 results in a significantly decreased percentage of correct answers, especially for the case of  
231 monolayer graphene (47%). This result was caused by the false detections produced by the vertices  
232 of shadows generated by contaminating objects, as presented in Supplementary Figure 16.

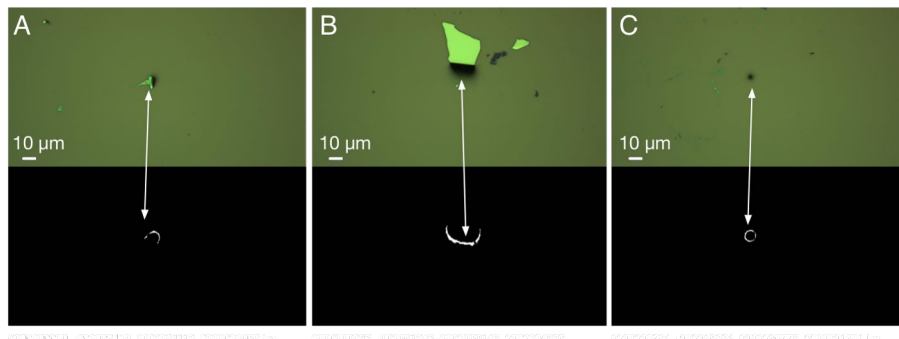

233  
234 Supplementary Figure 16. **Examples of false detection (A–C)** The false detection generated by  
235 condition 4 in Supplementary Table 3 エラー! 参照元が見つかりません。 . The top panels  
236 show input optical microscope images; the bottom panels show regions extracted as 2D crystals.  
237 The shadows generated by contaminating objects often result in false detections.

238  
239 Supplementary note 6

240 Remarks on the difference between the entropy and color thresholding.

241 To explain the difference between the images F and G, in エラー! 参照元が見つかりま  
242 せん。 , we summarized the response to the monolayer graphene, the bilayer graphene, corrugated  
243 crystals, and the tape residues in Supplementary Table 6. In general, the entropy thresholding gives  
244 positive response to the flat objects, which is surrounded by the edges. Therefore, it gives positive  
245 response to the monolayer graphene, bilayer graphene, and tape residues [Supplementary Table 6  
246 and Figure 3F]. On the other hand, the color thresholding extracts the region where the optical

247 intensity is within the set range. Therefore, it shows positive response to monolayer graphene and  
 248 corrugated crystals [Supplementary Table 6 and Figure 3G]. Although the difference between  
 249 extracted images were apparently slight, however by taking the intersection between the images F  
 250 and G, only the region of monolayer graphene was extracted, thereby demonstrating the different  
 251 nature in these thresholding algorithms. The robustness of the detection algorithm to the  
 252 contaminating objects has been provided by this mechanism.

|                            | Entropy thresholding<br>[Fig. 3 F] | Color thresholding<br>[Fig. 3G] | The intersection<br>between F and G |
|----------------------------|------------------------------------|---------------------------------|-------------------------------------|
| <b>Monolayer graphene</b>  | Positive                           | Positive                        | Positive                            |
| <b>Bilayer graphene</b>    | Positive                           | Negative                        | Negative                            |
| <b>Corrugated crystals</b> | Negative                           | Positive                        | Negative                            |
| <b>Tape residues</b>       | Positive/Negative                  | Negative                        | Negative                            |

253 Supplementary Table 6. The typical response of the entropy and color thresholding to the  
 254 monolayer graphene, bilayer graphene, corrugated crystals, and tape residues.

255

256 **Supplementary note 7**

257 **The examples of failed transfer.**

258 In the main text, we commented on the high success rate for the transfer. We consider that it is fair  
 259 to show some examples of the cases which fail. The most common result when we fail is that the  
 260 targeted 2D crystals are remained on the surface of SiO<sub>2</sub>/Si substrate after contacting the host 2D  
 261 crystal to the targeted 2D crystal, as schematically illustrated in Supplementary Figure 17. To  
 262 illustrate some example of the failure, we show the several targeted 2D crystals that could not be  
 263 picked up in Supplementary Figure 18A-C. In all cases, the host crystals were the single crystals  
 264 of hBN. In the case of Supplementary Figure 18A, the thick region of hBN [white arrow in  
 265 Supplementary Figure 18A] was picked-up whereas the thin hBN [red arrow in Supplementary



266 Figure 18A] was remained on the substrate. In the case of Supplementary Figure 18B, the similar  
267 failure took place; the thick region [white arrow in Supplementary Figure 18B] was lifted but the  
268 other area was remained on the substrate. As a reason of these failures, we speculate that the thick  
269 2D crystal prevented targeted 2D crystal to be contacted to the host 2D crystals, thereby remaining  
270 it on the SiO<sub>2</sub>/Si substrate. In the case of Supplementary Figure 18C, the whole structure of trilayer  
271 graphene [red arrow in Supplementary Figure 18C] was not lifted. In this case, the targeted flake  
272 was kept in the ambient air for more than 1 month before annealed in the Ar/H<sub>2</sub> gas. Therefore,  
273 the surface of targeted 2D crystals were presumably be contaminated.

274 Nevertheless, if we load the 2D crystals immediately after the exfoliation, perform annealing  
275 inside the glove box, and select the 2D crystals so that they were well separated from the other 2D  
276 crystals, we achieved almost perfect success rate. In the previous setup built in the ambient air, the  
277 success rate was gradually decreased, and after the several hours of the exposure of the targeted  
278 2D crystal to the ambient air, the success rate was decreased to almost zero, which is presumably  
279 due to the contamination accumulated on the surface of the targeted 2D crystal during the  
280 fabrication process.

281 We speculate that the reason of high success rate realized in this system owes to the fact that  
282 the most time-consuming part of the fabrication process (searching and transfer) were conducted  
283 entirely inside the glove box enclosure, which prevents contaminating the surface.

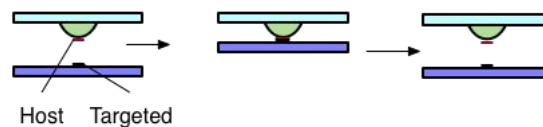

284  
285 Supplementary Figure 17. The schematic illustration of the typical cases which we fail.

286

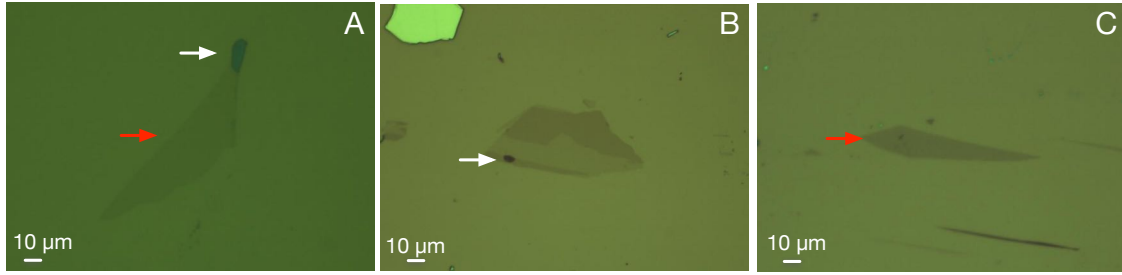

287

288 Supplementary Figure 18. Representative optical microscope images of the 2D flakes that we  
289 failed to pick-up. The materials were (A) thin hBN, (B) hybrid monolayer and trilayer graphene,  
290 and (C) trilayer graphene. The trilayer graphene (C) was exposed to the ambient air for more than  
291 a month before annealing in Ar/H<sub>2</sub> gas.

292

293 Supplementary note 8

294 Remarks on the final alignment process.

295 When we performed the automated alignment process, it can bring the targeted 2D crystals  
296 within a lateral error of 10 μm, and if this order of tolerance can be afforded, the system can stack  
297 the 2D crystals in a fully automated way. The stamping demonstration presented in supplementary  
298 movie S4 was conducted by just clicking the confirmation button at 00:53 and no manual  
299 alignment was performed. In addition, we intentionally implemented the system so that the human  
300 operators can override the alignment process even during the automated lifting process of SiO<sub>2</sub>/Si  
301 chip. We believe that this strategy is favorable for good balancing between the flexibility and  
302 concreteness, and for the device production in the fundamental scientific research activity. We  
303 consider that the fully automated alignment is an optional functionality, which will be  
304 implemented in the future version of the software system.

305 Supplementary note 9

306 Selection of the straight edges on the two-dimensional crystals

307 In the CAD software, the crystal orientation was inferred relying on the straight edges of

308 the 2D crystals. The selection of the flakes was performed by an operator. To illustrate the fitting  
 309 process, we present the screenshots of the CAD software [Supplementary Figure 19].  
 310 Supplementary Figure 19A shows the optical microscope image of the exfoliated hBN flake. The  
 311 edge patterns extracted from Supplementary Figure 19A are presented in Supplementary Figure  
 312 19B. The operator draws a box on the computer screen [white arrow in Supplementary Figure  
 313 19B]. Then the straight line is fitted to the edge pattern by using the least-squares method  
 314 [Supplementary Figure 19C]. The extracted angle of the straight line to the horizontal axis was (i)  
 315  $\theta = 17.4215^\circ$ . The other edges can also be fitted as (ii)  $\theta = 77.2986^\circ$ , and (iii)  $\theta = 17.5254^\circ$   
 316 [Supplementary Figure 19D]. The relative angle between (i) and (ii) was  $\Delta\theta_{i-ii} \sim 59.87^\circ$ , whereas  
 317 that between (i) and (iii) was  $\Delta\theta_{i-iii} = 0.1^\circ$ . Note that, these values reflect the crystallographic  
 318 symmetry of hBN, where the expected exfoliation angles were  $\Delta\theta_{i-ii} = 60^\circ$  and  $\Delta\theta_{i-iii} = 0^\circ$ .  
 319 From these results, we estimate the extent of error in the fitting process to be  $\sim 0.1^\circ$ .

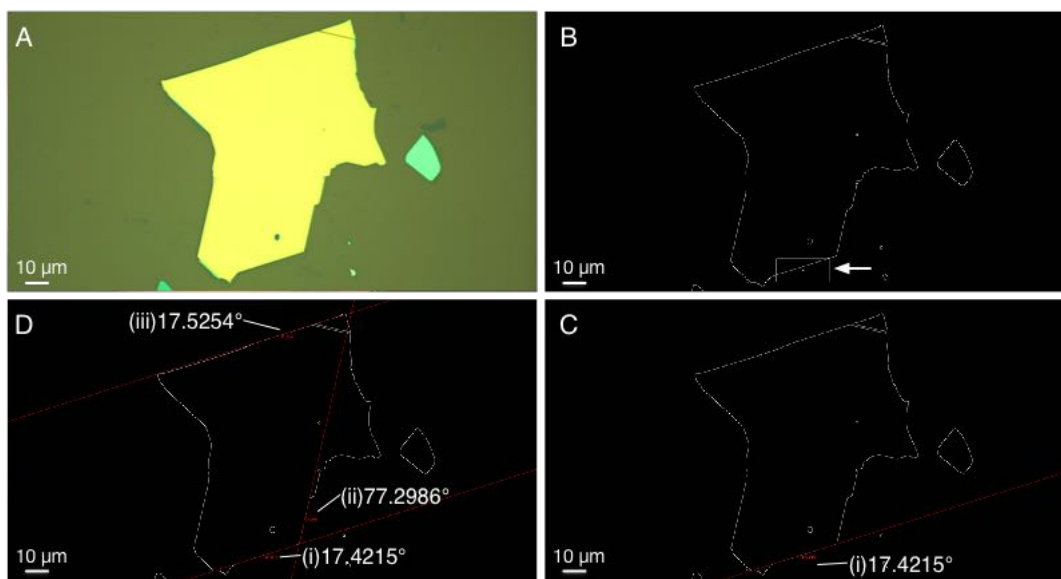

320  
 321 Supplementary Figure 19. The demonstrations of the edge fitting. The presented images are the  
 322 screenshots of the software. (A) The representative thick hBN flake. (B) (white curves) the edge

323 patterns extracted from the image A. The rectangle highlighted by the white arrow indicates the  
324 region that are going to be fitted by the straight line. (C) The extracted angle between the horizontal  
325 line was  $17.4215^\circ$ . (D) The extracted angles of the other edges relative to the horizontal line were  
326  $77.2986^\circ$  and  $17.5254^\circ$ .

327

328 **Supplementary note 10**

329 **Accuracy of the alignment in terms of the rotational shift**

330 To illustrate the accuracy and reproducibility in the rotational angle between flakes, we provide in  
331 Supplementary Figure 20, the comparison between the designed (A and B) and obtained angles (C  
332 and D) for the two representative devices numbered 0110 and 0112. In the device 0110, the  
333 alignment angles between the set of straight edges were designed as  $3.0^\circ$  [Supplementary Figure  
334 20 A]. The measured angles between the corresponding straight edges in the fabricated device  
335 were  $2.57^\circ$  [Supplementary Figure 20 C]. In the device 0112, the alignment angles between the  
336 set of edges were designed as  $40.3^\circ$  [Supplementary Figure 20 B] and the result of measurement  
337 was  $39.0^\circ$  [Supplementary Figure 20 D]. However, note that the fitting to the straight edges in the  
338 optical microscope images were conducted by hand-fitting. From these data, the accuracy of the  
339 alignment angle can be estimated to be less than  $1.5^\circ$

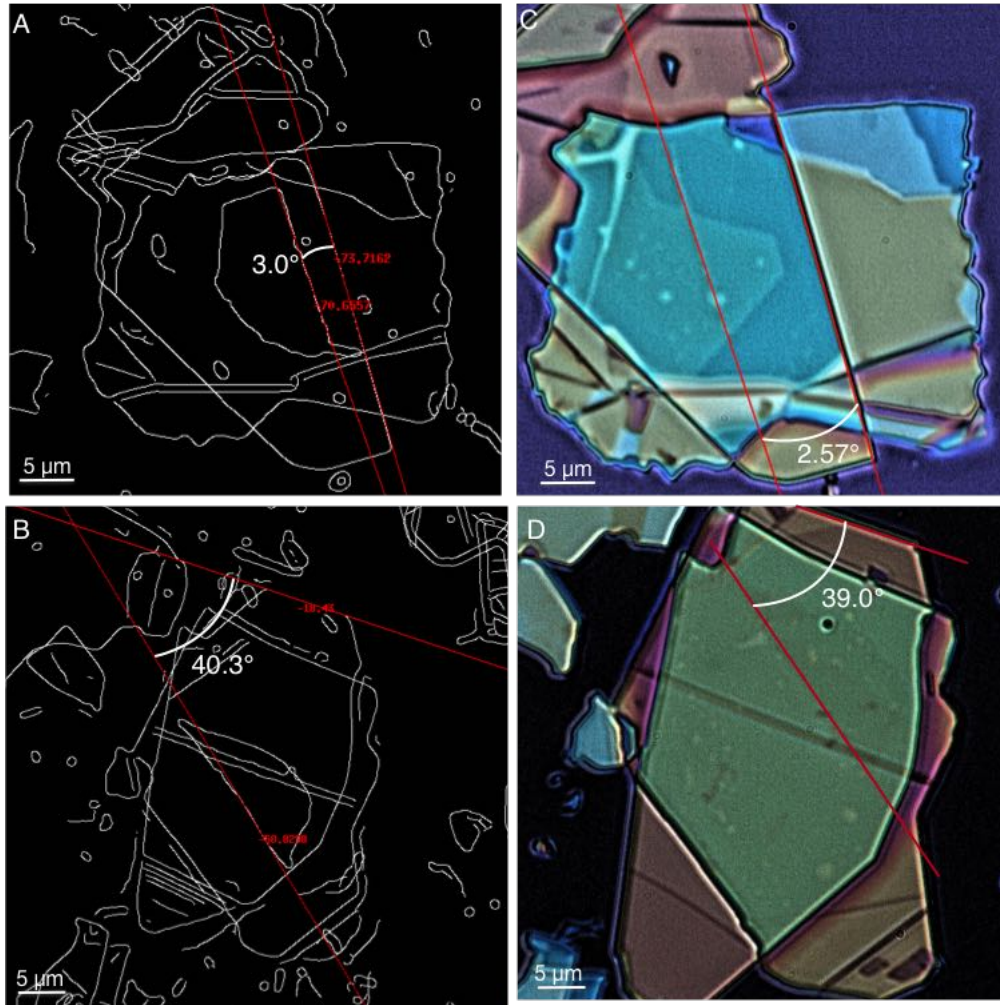

340

341 Supplementary Figure 20. A and B, the relative angles between the straight edges in the vdW  
 342 heterostructures design. C and D the optical microscope images of the fabricated vdW  
 343 heterostructures. Note that, in these devices, translational positions were intentionally shifted with  
 344 respect to the designed position during the assembly. Therefore, the alignment error in the  
 345 translational direction needs be ignored.

346

347 Supplementary note 11

348 Accuracy of the alignment in terms of the translational shift

349 To demonstrate the of alignment in terms of the translational shift, we conducted the alignment

350 demonstration as presented in Supplementary Figure 21. Supplementary Figure 21A-H shows the  
351 image of the hBN crystal in the CAD software screen. In these designs, the alignment center was  
352 locked to the fixed position on the hBN flake, as indicated by the red lines in Supplementary  
353 Figure 21A-H. To demonstrate the alignment accuracy, each design was rotated by the step of  $\theta =$   
354  $45^\circ$ . The result of automated alignment in the stamping apparatus were presented in  
355 Supplementary Figure 21I-P. Note that, during the alignment, no human intervention was made.  
356 The targeted flake was aligned to the designated position within a lateral error of  $10\ \mu\text{m}$ .

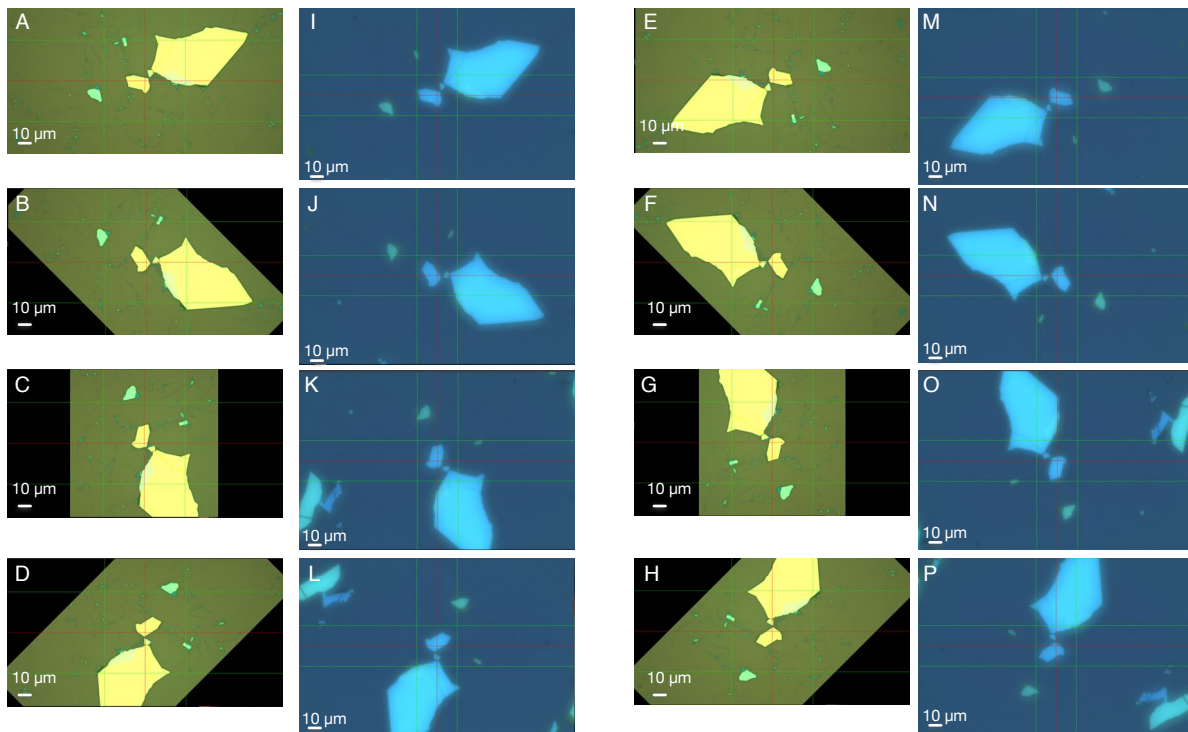

357  
358 Supplementary Figure 21. The demonstration of the alignment. (A-H) The optical microscope  
359 image of the hBN crystal in the CAD screen. The hBN flake was rotated by a step of  $\theta = 45^\circ$ . The  
360 targeted alignment center was indicated by the red straight lines. (I-P) The optical microscope  
361 image after alignment. The screen center was indicated by the red straight lines.

362

363 Supplementary note 12

364 Applicability of the process for assembling heterostructures based on CVD-grown 2D  
365 crystals.

366 We comment on the applicability of this procedure for assembling heterostructures based CVD-  
367 grown 2D crystals. This system is in principle applicable to the assembly of heterostructures based  
368 on CVD grown 2D crystals. Indeed, we have succeeded in picking up the CVD-grown 2D crystals  
369 by using the same stamping procedure in the ambient condition [Y. Hoshi *et al*, PRB 95, 241403  
370 (2017)].

371
