# Supplementary material for: Autonomous robotic searching and assembly of two-dimensional crystals to build van der Waals superlattices
Source: PubMed Central journal article supplement (PMC5897399; doi:10.1038/s41467-018-03723-w), 2018-04-12
Supplement: 41467_2018_3723_MOESM3_ESM.pdf [file 41467_2018_3723_MOESM3_ESM.pdf]

## **Description of Additional Supplementary Files**

File Name: Supplementary Movie 1

Description: Supplementary Movie of 2DMMS-Finder in operation (overall picture).

File Name: Supplementary Movie 2

Description: Supplementary Movie of 2DMMS-Finder in operation (screenshots).

File Name: Supplementary Movie 3

Description: Supplementary Movie of transferring chip in 2DMMS-Stamper.

File Name: Supplementary Movie 4

Description: Supplementary Movie of 2DMMS-Stamper (overall picture).

File Name: Supplementary Movie 5

Description: Supplementary movie of alignment procedure in 2DMMS-Stamper (screenshots).
